# Supplementary material for: Gram-Scale Preparation of Cannflavin A from Hemp (Cannabis sativa L.) and Its Inhibitory Effect on Tryptophan Catabolism Enzyme Kynurenine-3-Monooxygenase
Source: MDPI journal article supplement (doi:10.3390/biology11101416), 2022-09-28

# Supplementary Materials

## Gram-Scale Preparation of Cannflavin A From Hemp (*Cannabis sativa* L.) and Its Inhibitory Effect on Tryptophan Catabolism Enzyme Kynurenine-3-Monooxygenase

Figure S1.  $^1\text{H}$ -NMR spectrum of CFA.

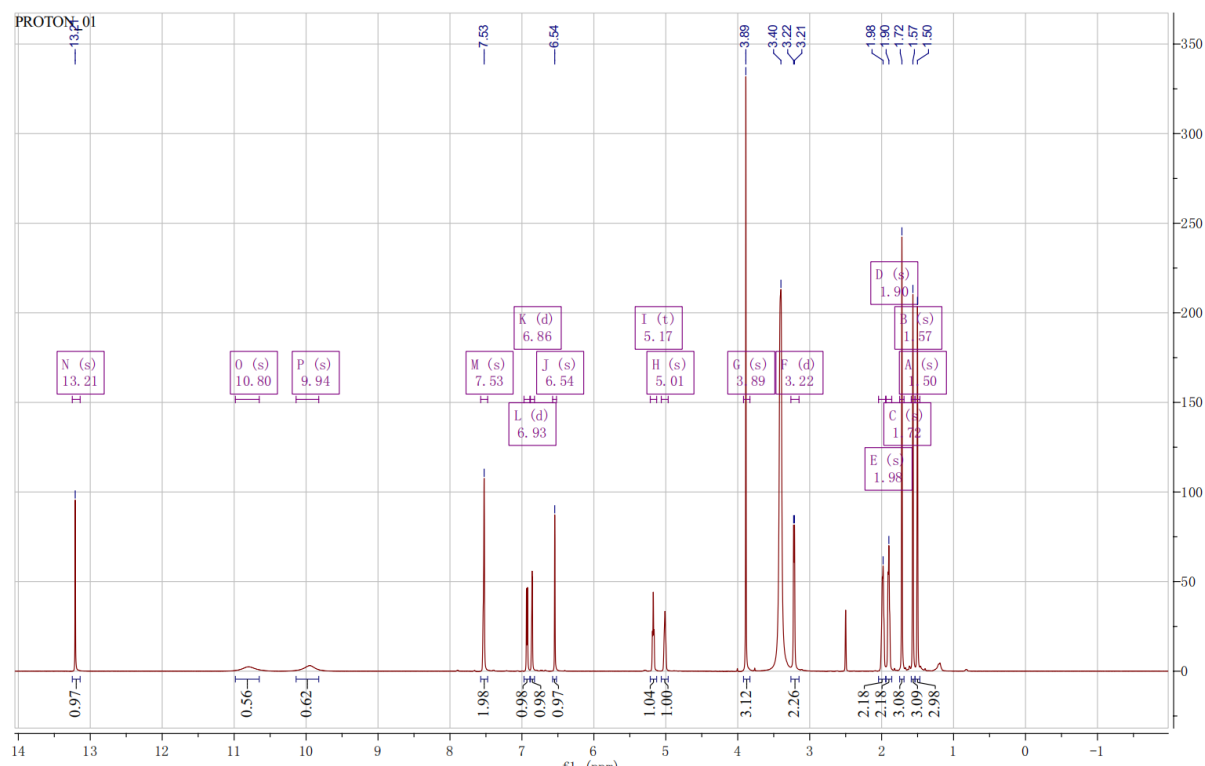

**Figure S2.**  $^{13}\text{C}$ -NMR spectrum of CFA.

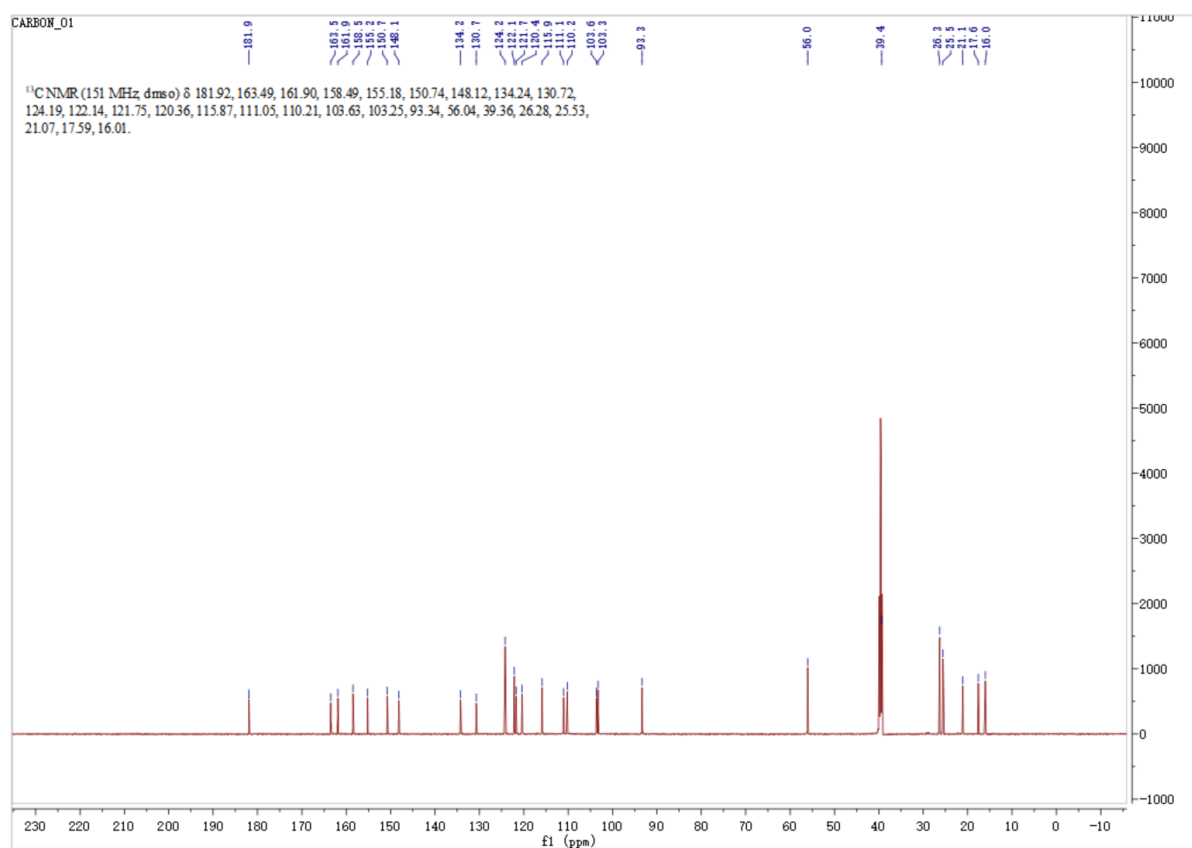

Supplement: s1 [file s1]
